# Supplementary material for: Cancer Vaccine Therapy Using Carcinoembryonic Antigen - expressing Dendritic Cells generated from Induced Pluripotent Stem Cells
Source: PubMed Central journal article supplement (PMC5854614; doi:10.1038/s41598-018-23120-z), 2018-03-15
Supplement: 41598_2018_23120_MOESM1_ESM.pdf [file 41598_2018_23120_MOESM1_ESM.pdf]

## Scientific Reports Research Articles

# Cancer Vaccine Therapy Using Carcinoembryonic Antigen – expressing Dendritic Cells Generated from Induced Pluripotent Stem Cells

Junya Kitadani<sup>1</sup>, Toshiyasu Ojima<sup>1</sup>, Hiromitsu Iwamoto<sup>1</sup>,  
Hirotaka Tabata<sup>1</sup>, Mikihiro Nakamori<sup>1</sup>, Masaki Nakamura<sup>1</sup>,  
Keiji Hayata<sup>1</sup>, Masahiro Katsuda<sup>1</sup>, Masayasu Miyajima<sup>2</sup>  
and Hiroki Yamaue<sup>1</sup>

<sup>1</sup> Second Department of Surgery, Wakayama Medical University,  
School of Medicine, Wakayama 641-8510, Japan

<sup>2</sup> Laboratory Animal Center, Wakayama Medical University,  
School of Medicine, Wakayama 641-8510, Japan

(a)

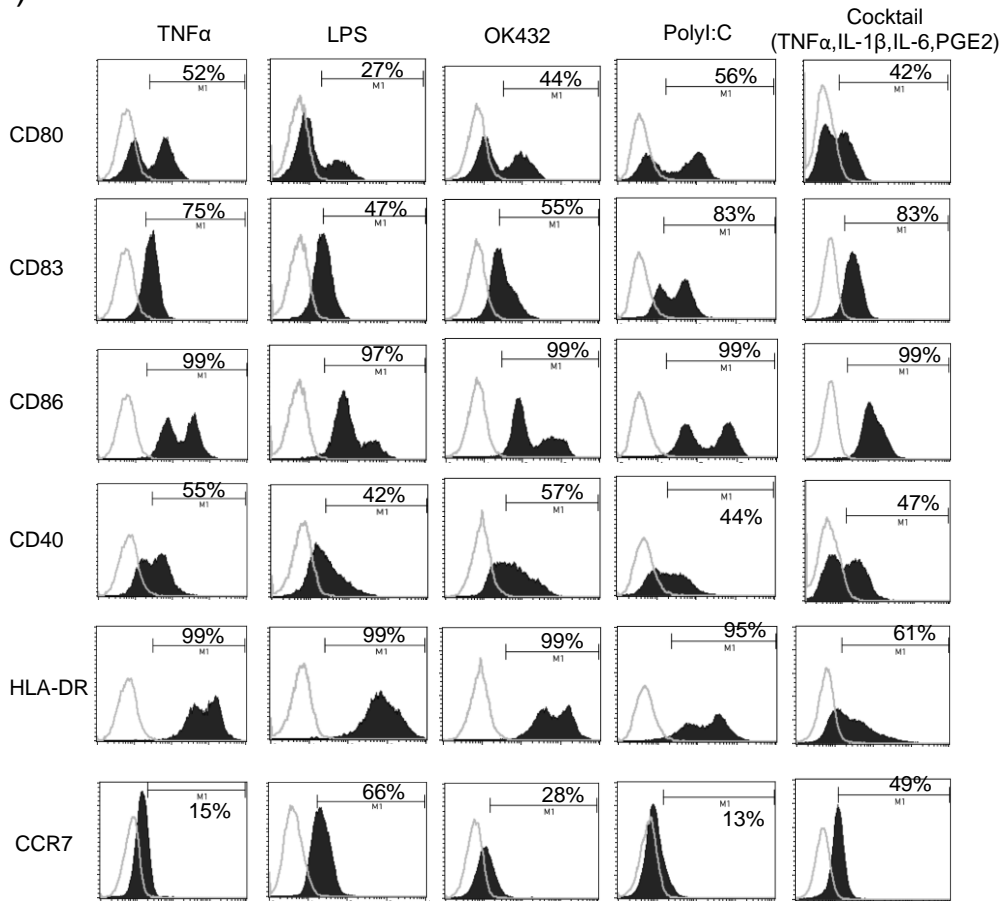

(b)

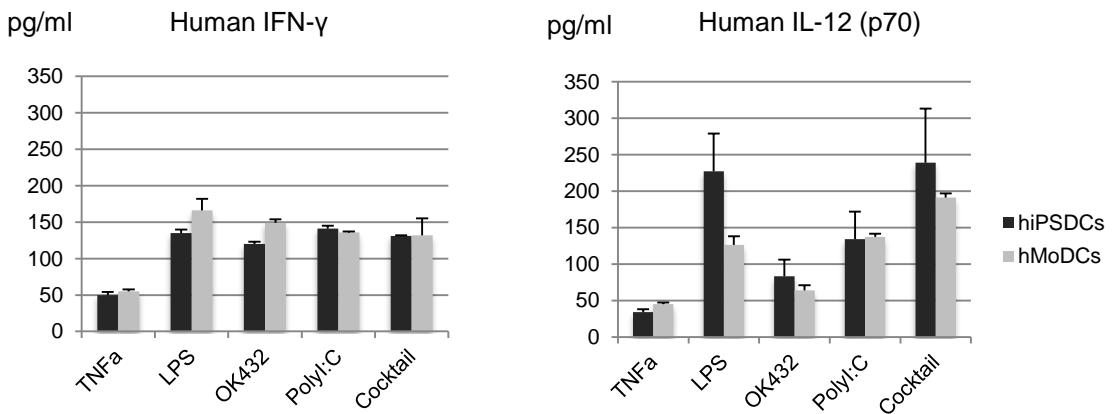

Maturation stability of hiPSDCs by other maturation factors. (a) Surface phenotypes of hiPSDCs matured by other representative maturation factors (rhTNF $\alpha$ , lipopolysaccharide [LPS], OK432, polyinosinic-polycytidylic acid [PolyI:C]). Histograms show the staining patterns of specific antibodies (black) and isotype-matched controls (thin lines). (b) Secretion of IFN- $\gamma$  and IL-12 (p70) from hiPSDCs matured by other representative maturation factors (rhTNF $\alpha$ , LPS, OK432, PolyI:C). Data are mean  $\pm$  SD (three donors for each group).
